# Supplementary material
Source: publisher site journal article supplement (https://www.dovepress.com/article/416395)
Supplement: Supplementary file 1 [file get_supplementary_file.php]

**Supplemental Material**

**Racial Differences and Contributory Cardiovascular and Non-cardiovascular Risk Factors Towards Chronic Kidney Disease Progression**

Choi Y et al.

**Supplemental Figure 1.** Definition of 5 chronic kidney disease (CKD) risk categories

| **Combination categories of eGFRand UACR** | | **UACR categories (mg/g)** | | | |
| --- | --- | --- | --- | --- | --- |
| **A1a**  **(< 10 mg/g)** | **A1b**  **(10**–**29 mg/g)** | **A2**  **(30**–**299 mg/g)** | **A3**  **(≥ 300 mg/g)** |
| **eGFR categories (ml/min/1.73m2)** | **G1** **(≥ 90)** | **1a** | **1b** | **2** | **3** |
| **G2** **(60**–**89)** | **1a** | **1b** | **2** | **3** |
| **G3a** **(45**–**59)** | **3** | **3** | **3** | **4** |
| **G3b** **(30**–**44)** | **3** | **3** | **4** | **4** |
| **G4** **(15**–**29)** | **4** | **4** | **4** | **4** |
| **G5** **(< 15)** | **4** | **4** | **4** | **4** |

**Notes:** KDIGO 2012 risk matrix, modified to capture mild severity (figure was abstracted from Figure 1 of Choi et al 2022; reference 10). Given relatively few people in G3aA1, those people were included with others who had eGFR <60 (orange category), whereas in the KDIGO 2012 risk matrix they were in the yellow category. Eachblock is formed based on combination categories of eGFRand UACR. CKD risk category numbering is such that a higher number reflects presumed greater risk.

**Abbreviations**: eGFR, estimated glomerular filtration rate; UACR, urinary albumin-to-creatinine ratio. The 5 CKD risk categories; their clinical description; and their KDIGO descriptors are as follows:

| No CKD (1a) | eGFR ≥60 and UACR <10 (Dark Green) |
| --- | --- |
| Low Risk (1b) | eGFR ≥ 60 and UACR 10−29 (Light Green) |
| Moderate Risk (2) | eGFR ≥60 and UACR 30−299 (Yellow) |
| High Risk (3) | (eGFR 30-59 and UACR <30) or (eGFR 45−59 and UACR 30−299) or (eGFR ≥60 and UACR ≥300) (Orange) |
| Very High Risk (4) | eGFR < 30 or (eGFR 30−44 and UACR 30−299) or (eGFR 30−59 and UACR ≥ 300) (Red) |
